# Supplementary material for: Introduction: Observations and Modeling of the Green Ocean Amazon (GoAmazon2014/5)
Source: Copernicus journal article supplement (doi:10.5194/acp-16-4785-2016), 2016-04-19
Supplement: Supplementary file 1 [file acp-16-4785-2016-supplement.pdf]

Supplement of Atmos. Chem. Phys., 16, 4785–4797, 2016  
<http://www.atmos-chem-phys.net/16/4785/2016/>  
doi:10.5194/acp-16-4785-2016-supplement  
© Author(s) 2016. CC Attribution 3.0 License.

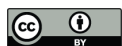

*Supplement of*

## **Introduction: Observations and Modeling of the Green Ocean Amazon (GoAmazon2014/5)**

**S. T. Martin et al.**

*Correspondence to:* S. T. Martin ([scot\\_martin@harvard.edu](mailto:scot_martin@harvard.edu))

The copyright of individual parts of the supplement might differ from the CC-BY 3.0 licence.

## List of Supplementary Tables

- Table S1.** Instrumentation deployed at T0a (ATTO) during the Intensive Operating Periods of GoAmazon2014/5.
- Table S2.** Instrumentation deployed at T0e (EMPRAPA) during the Intensive Operating Periods of GoAmazon2014/5.
- Table S3.** Instrumentation deployed at T0k (K34; ZF2) during the Intensive Operating Periods of GoAmazon2014/5.
- Table S4.** Instrumentation deployed at T0t (TT34; ZF2) during the Intensive Operating Periods of GoAmazon2014/5.
- Table S5.** Instrumentation deployed at T1p (Ponta Pelada) during the Intensive Operating Periods of GoAmazon2014/5.
- Table S6.** Instrumentation deployed at T1 (INPA campus) during the Intensive Operating Periods of GoAmazon2014/5.
- Table S7.** Instrumentation deployed at T2 (Tiwa) during the Intensive Operating Periods of GoAmazon2014/5.
- Table S8.** University instrumentation deployed at T3 (Fazenda Agropecuária Exata) during the Intensive Operating Periods of GoAmazon2014/5.
- Table S9.** MAOS instrumentation deployed at T3 (Fazenda Agropecuária Exata) during the Intensive Operating Periods of GoAmazon2014/5.
- Table S10.** AMF-1 instrumentation deployed at T3 (Fazenda Agropecuária Exata) during the Intensive Operating Periods of GoAmazon2014/5.
- Table S11.** Instrumentation deployed at T3u (UEA) during the Intensive Operating Periods of GoAmazon2014/5.

**Table S12.** Instrumentation deployed on board the G1 (AMF) aircraft during the Intensive Operating Periods of GoAmazon2014/5.

**Table S13.** Instrumentation deployed on board the HALO aircraft during the second Intensive Operating Period of GoAmazon2014/5.

## List of Supplementary Figures

- Figure S1.** Nighttime illumination in the environs of the city of Manaus ( $-3.1^{\circ}$ ,  $-60.0^{\circ}$ ) for the year 2010. The yellow points show the locations of the GoAmazon2014/5 research sites of Figure 1. Source: [http://maps.ngdc.noaa.gov/viewers/dmsp\\_gcv4/](http://maps.ngdc.noaa.gov/viewers/dmsp_gcv4/) and <http://ngdc.noaa.gov/eog/dmsp/downloadV4composites.html>, accessed 12 August 2015.
- Figure S2.** Flight tracks of the G1 aircraft during IOP1 segregated by (a) 250 to 750 m above sea level, (b) 750 to 1250 m, (c) 1250 to 1750 m, and (d) above 1750 m.
- Figure S3.** Flight tracks of the G1 aircraft during IOP2 segregated by (a) 250 to 900 m above sea level, (b) 1000 to 2000 m, and (c) above 2000 m.
- Figure S4.** Locations of power plants in the environs of Manaus (orange pins). The location of a large refinery is also shown (blue pin). Yellow pins show the locations of some of the GoAmazon2014/5 research sites (cf. Figure 1). Source: personal communication, Adan Medeiros, 10 August 2015.
- Figure S5.** Locations of brick factories between Manaus (T1) and to the north of Manacapuru (T3). Source: personal communication, Bruno Portela, 8 September 2015.
- Figure S6.** Anomalies of sea surface temperature (SST) during (a) IOP1 and (b) IOP2. The climatology of 1981 through 2010 is the used as the reference for presentation of the anomalies in 2014 based on the NCEP/NCAR reanalysis. Source: <http://rda.ucar.edu/datasets/ds090.0/>, accessed 12 September 2015.
- Figure S7.** Satellite-based detection of fires on regional scale. Left and right columns represent periods of IOP1 and IOP2, respectively. Each fire icon indicates the detection of one fire event during the seven-day observation period. The yellow markers

indicate the locations of GoAmazon2014/5 research sites (cf. Figure 1). Source: <http://www.dpi.inpe.br/proarco/bdqueimadas/>, accessed 7 August 2015.

**Figure S8.** Satellite-based detection of fires on the scale of South America. Left and right columns represent periods of IOP1 and IOP2, respectively. Color scaling in red runs from 0 to 100 fire events detected in a  $1^\circ \times 1^\circ$  grid box during the seven-day observation period. Some grid boxes have more than 100 events. The green point represents the location of Manaus. Source: <http://www.dpi.inpe.br/proarco/bdqueimadas/>, accessed 7 August 2015.

**Figure S9.** Aerosol optical depth observed by the MODIS instrument on the AQUA satellite (eight-day composites, Collection 5). Left and right columns represent periods of IOP1 and IOP2, respectively. Color scaling is from an optical depth of 0.0 to 0.8. Black indicates regions over which optical depth was not retrieved, largely because of the high albedo of the Earth's surface in these regions. Source: [http://modis-atmos.gsfc.nasa.gov/MYD08\\_E3/browse\\_c51.html](http://modis-atmos.gsfc.nasa.gov/MYD08_E3/browse_c51.html), accessed 5 August 2015.

| Instrument                                                      | Abbreviation       | Data Available |      | Investigator   |
|-----------------------------------------------------------------|--------------------|----------------|------|----------------|
|                                                                 |                    | IOP1           | IOP2 |                |
| Aerosol Chemical Speciation Monitor (Aerodyne)                  | ACSM               | Yes            | Yes  | Artaxo         |
| Scanning Mobility Particle Sizer (TSI)                          | SMPS               | Yes            | Yes  | Artaxo         |
| Condensation Particle Counter (Grimm, model 5412)               | CPC                | Yes            | Yes  | Pöhlker        |
| Multiangle Absorption Photometer 5012 (Thermo, model 5012)      | MAAP               | Yes            | Yes  | Pöhlker        |
| Aethalometer (Magee)                                            | AE30               | Yes            | Yes  | Artaxo         |
| Nephelometer (Ecotech Aurora 3000)                              |                    | Yes            | Yes  | Artaxo         |
| Ultra-High Sensitivity Aerosol Spectrometer (DMT)               | UHSAS              | Yes            | Yes  | Pöhlker        |
| Single Particle Soot Photometer (DMT)                           | SP2                | Yes            | Yes  | Pöhlker        |
| Size-Resolved Cloud Condensation Nuclei Counter (DMT)           | Size-resolved CCNC | No             | Yes  | Artaxo/Pöhlker |
| Optical Particle Sizer (TSI, model 3330)                        | OPS                | Yes            | Yes  | Pöhlker        |
| Wide Range Aerosol Spectrometer (Grimm)                         | WRAS               | No             | Yes  | Pöhlker        |
| Wideband Integrated Bioaerosol Spectrometer (DMT)               | WIBS-4             | No             | Yes  | Su             |
| Proton-Transfer-Reaction Quadrupole Mass Spectrometer (Ionicon) | PTR-Q-MS           | Yes            | Yes  | Kesselmeier    |
| Picarro CRDS (Model G1302; S/N CKADS-018)                       |                    | Yes            | Yes  | Lavric         |
| Picarro CRDS (Model G1301; S/N CKADS-109)                       |                    | Yes            | Yes  | Lavric         |
| Chemoluminescence NOx monitor (Ecotech CLD TR 780)              | CLD                | Yes            | Yes  | Sörgel         |
| CO2 monitor (LI-COR 7000)                                       |                    | Yes            | Yes  | Sörgel         |
| Ozone monitor (TEI 49 I)                                        |                    | Yes            | Yes  | Sörgel / Souza |
| Optical Fog Sensor (Eigenbrodt)                                 |                    | No             | Yes  | Pöhlker        |
| Soil Heat Flux Sensor (HFP01, Hukseflux)                        |                    | Yes            | Yes  | Araujo         |
| Water Content Reflector (CS615, Campbell)                       |                    | Yes            | Yes  | Araujo         |
| Thermistor (108, Campbell)                                      |                    | Yes            | Yes  | Araujo         |
| Pyranometer (CMP21 & CMP4, Kipp & Zonen)                        |                    | Yes            | Yes  | Araujo         |
| Quantum Sensor (PAR-LITE, Kipp & Zonen)                         |                    | Yes            | Yes  | Araujo         |
| Net radiometer (NR-LITE, Kipp & Zonen)                          |                    | Yes            | Yes  | Araujo         |
| UV radiometer (Kipp & Zonen, CUV5)                              |                    | Yes            | Yes  | Araujo         |
| Rain Gauge (TB4, Hydrological Services Pty. Ltd.)               |                    | Yes            | Yes  | Araujo         |
| Termohyrometer (CS215, Rotronic Measurement Solutions)          |                    | Yes            | Yes  | Araujo         |
| Barometer (PTB101B, Vaisala)                                    |                    | Yes            | Yes  | Araujo         |
| 2-D Sonic Anemometer (Windsonic, Gill)                          |                    | Yes            | Yes  | Araujo         |
| 3-D Sonic Anemometer (Windmaster, Gill)                         |                    | Yes            | Yes  | Araujo         |
| IRGA (LI-7500A & LI7200, LI-COR)                                |                    | Yes            | Yes  | Araujo         |

| Instrument                                                                    | Abbreviation | Data Available |      | Investigator    |
|-------------------------------------------------------------------------------|--------------|----------------|------|-----------------|
|                                                                               |              | IOP1           | IOP2 |                 |
| Hg Monitor (TEKRAN)                                                           | Tekran       | Yes            | Yes  | Artaxo          |
| Nephelometer (Ecotech)                                                        | Neph_M9003   | Yes            | Yes  | Artaxo          |
| Multi filter shadow band radiometer (YesInc)                                  | MFR          | Yes            | Yes  | Barbosa         |
| Sun Photometer (Cimel)                                                        | Aeronet      | Yes            | Yes  | Artaxo          |
| UV Raman Lidar (Raymetrics)                                                   | Lidar        | Yes            | Yes  | Barbosa         |
| 24GHz Micro Rain Radar (Metek)                                                | MRR          | No             | Yes  | Barbosa         |
| Laser precipitation monitor (Thies)                                           | Disdro_Thies | Yes            | Yes  | Barbosa         |
| Meteorological weather station (Davis)                                        | MetDavis     | No             | No   | Barbosa / Souza |
| Meteorological weather station (Thies)                                        | MetThies     | No             | Yes  | Barbosa         |
| Meteorological weather station (Gill)                                         | MetGill      | No             | Yes  | Barbosa         |
| NetR8 GNSS Receiver (Trimble)                                                 | GNSS         | Yes            | Yes  | Barbosa         |
| Precipitation Collector NSA 181/KE DURAN (Eigenbrodt)                         | Eigenbrodt   | No             | Yes  | Barbosa         |
| Meteorological weather station (Campbell)                                     | MetCampbell  | Yes            | Yes  | Machado         |
| Passive Infrared Microwave radiometer MP3000 (Radiometrics)                   | MP3000       | Yes            | No   | Machado         |
| Parsivel Disdrometer (OTT)                                                    | Parsivel     | Yes            | No   | Machado         |
| IRGASON Integrated CO2 and H2O Open-Path Gas Analyzer and 3D Sonic Anemometer | FluxCampbell | Yes            | Yes  | Machado         |

| <b>Instrument</b>                                | <b>Abbreviation</b> | <b>Data Available</b> |             | <b>Investigator</b> |
|--------------------------------------------------|---------------------|-----------------------|-------------|---------------------|
|                                                  |                     | <b>IOP1</b>           | <b>IOP2</b> |                     |
| Proton transfer reaction mass spectrometer       | PTR-MS              | Yes                   | Yes         | Jardine             |
| Gas chromatograph - mass spectrometer            | GC-MS               | Yes                   | Yes         | Jardine             |
| Proton transfer reaction mass spectrometer       | PTR-MS              | No                    | Yes         | Chamecki/Fuentes    |
| Gas chromatograph - mass spectrometer            | GC-MS               | No                    | Yes         | Chamecki/Fuentes    |
| Sonic anemometers (10)                           |                     | No                    | Yes         | Chamecki/Fuentes    |
| Water vapor gas analyzer                         | IRGA                | No                    | Yes         | Chamecki/Fuentes    |
| Carbon dioxide gas analyzer                      | IRGA                | No                    | Yes         | Chamecki/Fuentes    |
| Ozone gas analyzer                               |                     | No                    | Yes         | Chamecki/Fuentes    |
| Sulfur dioxide gas analyzer                      |                     | No                    | Yes         | Chamecki/Fuentes    |
| Carbon monoxide gas analyzer                     |                     | No                    | Yes         | Chamecki/Fuentes    |
| Nitric oxide gas analyzer                        |                     | No                    | Yes         | Chamecki/Fuentes    |
| Fast mobility particle sizer                     | FMPS                | No                    | Yes         | Chamecki/Fuentes    |
| Cloud condensation nuclei counter                | CCN counter         | No                    | Yes         | Chamecki/Fuentes    |
| Picarro (CO, CO <sub>2</sub> , H <sub>2</sub> O) | CKADS               | Yes                   | Yes         | Jardine/Fuentes     |



| <b>Instrument</b>                                                         | <b>Abbreviation</b> | <b>Data Available</b> |             | <b>Investigator</b> |
|---------------------------------------------------------------------------|---------------------|-----------------------|-------------|---------------------|
|                                                                           |                     | <b>IOP1</b>           | <b>IOP2</b> |                     |
| High-Resolution Time-of-Flight Aerosol Mass Spectrometer (Aerodyne Inc.)  | HR-ToF-AMS          | Yes                   | No          | McFiggans           |
| Proton-Transfer-Reaction Quadrupole Mass Spectrometer (Ionicon)           | PTR-Q-MS            | Yes                   | No          | McFiggans           |
| Multiangle Absorption Photometer 5012 (Thermo)                            | MAAP                | Yes                   | Yes         | Artaxo              |
| Nephelometer (TSI)                                                        |                     | Yes                   | Yes         | Artaxo              |
| Tapered-Element Oscillating Microbalance                                  | TEOM                | No                    | Yes         | Artaxo              |
| Picarro (CO, CO <sub>2</sub> , H <sub>2</sub> O)                          | CKADS               | Yes                   | Yes         | Artaxo              |
| Ozone                                                                     | Thermo_49i          | Yes                   | Yes         | Artaxo              |
| Four daily sondes at (-2.639°, -60.157°) (7.5 km to the southeast of T0t) |                     | Yes                   | Yes         | Machado             |

| <b>Instrument</b>                                       | <b>Abbreviation</b> | <b>Data Available</b> |             | <b>Investigator</b> |
|---------------------------------------------------------|---------------------|-----------------------|-------------|---------------------|
|                                                         |                     | <b>IOP1</b>           | <b>IOP2</b> |                     |
| Meteorological station                                  | MetHOBO             | Yes                   | Yes         | Souza               |
| Solar radiation and photosynthetically active radiation | MetHOBO             | Yes                   | Yes         | Souza               |
| Passive tubes for trace gases                           |                     | No                    | Yes         | Souza               |
| PM2.5 Filter Sampler                                    |                     | No                    | Yes         | Souza               |

| <b>Instrument</b>                                             | <b>Abbreviation</b> | <b>Data Available</b> |             |
|---------------------------------------------------------------|---------------------|-----------------------|-------------|
|                                                               |                     | <b>IOP1</b>           | <b>IOP2</b> |
| Four daily radio sondes                                       |                     | Yes                   | Yes         |
| S-band radar operated by the Amazon Protection System (SIPAM) |                     | Yes                   | Yes         |

| <b>Instrument</b>                                                    | <b>Abbreviation</b> | <b>Data Available</b> |             | <b>Investigator</b> |
|----------------------------------------------------------------------|---------------------|-----------------------|-------------|---------------------|
|                                                                      |                     | <b>IOP1</b>           | <b>IOP2</b> |                     |
| Proton-Transfer-Reaction Quadrupole Mass Spectrometer (Ionicon)      | PTR-Q-MS            | Yes                   | Yes         | Artaxo              |
| Ozone Monitor 49i (Thermo)                                           | O3 Monitor          | Yes                   | Yes         | Artaxo              |
| SO2 Monitor 43i (Thermo)                                             | SO2 Monitor         | Yes                   | Yes         | Artaxo              |
| Cavity Attenuated Phase Shift NO2 Monitor (Aerodyne Inc.)            | CAPS NO2            | No                    | Yes         | Artaxo              |
| CO, N2O monitor (Los Gatos Research)                                 | CO, NO2 LGR         | Yes                   | Yes         | Souza               |
| Scanning Mobility Particle Sizer (TSI Inc.)                          | SMPS                | Yes                   | Yes         | Artaxo              |
| Aerosol Chemical Speciation Monitor (Aerodyne Inc.)                  | ACSM                | Yes                   | Yes         | Artaxo              |
| Multangle Absorption Photometer 5012 (Thermo)                        | MAAP                | Yes                   | Yes         | Artaxo              |
| Aethalometer (Magee Inc.)                                            | 71 - AE33           | Yes                   | Yes         | Artaxo              |
| Nephelometer (Ecotech)                                               | 3-I Neph Aurora     | Yes                   | Yes         | Artaxo              |
| Tapered Element Oscillating Microbalance 1405 (Thermo)               | TEOM PM2.5 & PM10   | No                    | Yes         | Artaxo              |
| Cloud Condensation Nuclei Counter (Droplet Measurement Technologies) | Size-resolved CCNC  | No                    | Yes         | Artaxo              |

| Instrument                                                               | Abbreviation     | Data Available |      | Investigator     |
|--------------------------------------------------------------------------|------------------|----------------|------|------------------|
|                                                                          |                  | IOP1           | IOP2 |                  |
| Disdrometer (Parsivel)                                                   |                  | Yes            | Yes  | Machado          |
| X-Band Radar                                                             |                  | Yes            | Yes  | Machado          |
| Micro Rain Radar                                                         | MRR              | No             | Yes  | Machado          |
| High-Resolution Time-of-Flight Aerosol Mass Spectrometer (Aerodyne Inc.) | HR-ToF-AMS       | Yes            | Yes  | Alexander/Martin |
| Semi-Volatile Thermal Desorption Aerosol Gas Chromatograph               | SV-TAG           | Yes            | Yes  | Goldstein        |
| Size-Resolved Cloud Condensation Nuclei Counter                          | SCCN             | Yes            | Yes  | Wang             |
| Harvard Rebound Apparatus                                                | HBA              | Yes            | Yes  | Martin           |
| Oxidation Flow Reactor                                                   | OFR              | Yes            | Yes  | Jimenez          |
| Proton Transfer Reaction Time-of-Flight Mass Spectrometer                | PTR-ToF-MS       | Yes            | Yes  | Martin/MAOS      |
| Proton Transfer Reaction Time-of-Flight Mass Spectrometer                | PTR-ToF-MS       | Yes            | Yes  | Guenther         |
| Scanning Mobility Particle Sizer                                         | SMPS             | Yes            | Yes  | Jimenez          |
| HOx Chemical Ionization Mass Spectrometer                                | HOx-CIMS         | Yes            | Yes  | Kim              |
| Picarro CRDS G2401 analyzer (CO, CO2, CH4)                               | Picarro          | Yes            | Yes  | Jimenez          |
| Medium Volume Filter Sampler, PM1 (MCV, S.A.)                            |                  | Yes            | Yes  | Jimenez          |
| Air Quality Monitoring 60 (O3)                                           | AQM-60           | Yes            | Yes  | Souza            |
| Sequential Filter Sampler                                                |                  | Yes            | Yes  | Goldstein        |
| Transmission electron microscope grip sampler                            | TEM grid sampler | Yes            | Yes  | Buseck           |
| PM2.5 Filter Sampler                                                     |                  | Yes            | Yes  | Godoi/Souza      |
| Filter sampler (quartz and nuclepore)                                    |                  | Yes            | Yes  | Artaxo           |
| Laser-induced fluorescence                                               | LIF              | Yes            | Yes  | Keutsch          |
| Micro-Orifice Uniform-Deposit Impactor                                   | MOUDI            | No             | Yes  | Laskin           |
| Neutral cluster and Air Ion Spectrometer                                 | NAIS             | No             | Yes  | Petaja           |
| Nano particle size distribution                                          | NPSD             | Yes            | Yes  | Kuang            |
| Passive tubes for trace gases                                            |                  | Yes            | Yes  | Godoi/Souza      |
| Particle Size Magnifier                                                  | PSM              | No             | Yes  | Petaja           |
| Laser Induced Phosphorescence                                            | LIP              | No             | Yes  | Keutsch          |
| Thermal Desorption Chemical Ionization Mass Spectrometer                 | TD-CIMS          | Yes            | Yes  | Smith            |
| Precipitation collection for chemical analysis                           |                  | No             | Yes  | Pauliquevis      |
| Solar radiation and photosynthetically active radiation                  |                  | Yes            | Yes  | Souza            |
| Meteorological station                                                   |                  | Yes            | Yes  | Souza            |

| Instrument                                    | Abbreviation | Data Available |      |
|-----------------------------------------------|--------------|----------------|------|
|                                               |              | IOP1           | IOP2 |
| Aerosol Chemistry Speciation Monitor          | ACSM         | No             | Yes  |
| Aethalometer, 7-Wavelength                    | Aeth         | Yes            | Yes  |
| CO, N2O and H2O Analyzer                      | CO/N2O/H2O   | Yes            | Yes  |
| Condensation Particle Counter, Fine Mode      | CPCf         | Yes            | Yes  |
| Condensation Particle Counter, Ultrafine Mode | CPCu         | No             | No   |
| Meteorology Sensor                            | Met          | Yes            | Yes  |
| Nephelometer                                  | Neph         | Yes            | Yes  |
| Nephelometer, dry                             | NephDry      | Yes            | Yes  |
| Oxides of Nitrogen Analyzer                   | NO/NOx/NOy   | Yes*           | Yes  |
| Ozone Analyzer                                | O3           | Yes            | Yes  |
| Photoacoustic Soot Spectrometer, 3-Wavelength | PASS-3       | No             | No   |
| Particle Soot Absorption Photometer           | PSAP         | Yes            | Yes  |
| Proton Transfer Mass Spectrometer             | PTRMS        | Yes            | Yes  |
| Scanning Mobility Particle Sizer              | SMPS         | No             | No   |
| Single Particle Soot Photometer               | SP2          | Yes            | Yes  |
| SO2 Analyzer                                  | SO2          | No             | Yes  |
| Ultra-High Sensitivity Aerosol Spectrometer   | UHSAS        | Yes            | Yes  |

\*Only NO and NOy in IOP1

| Instrument                                                     | Abbreviation          | Data Available |      |
|----------------------------------------------------------------|-----------------------|----------------|------|
|                                                                |                       | IOP1           | IOP2 |
| Two-Channel Narrow Field of View Zenith Radiometer             | 2NFOV                 | Yes            | No   |
| Atmospheric Emitted Radiance Interferometer                    | AERI                  | Yes            | Yes  |
| Propeller Vane Wind Sensors                                    | Anemometer            | Yes            | Yes  |
| Black and White pyranometer, shaded, downwelling               | B/W 8-48-SKY          | Yes            | Yes  |
| Barometer                                                      | Barometer             | Yes            | Yes  |
| Ceilometer Cloud Lidar                                         | Ceilometer            | Yes            | Yes  |
| Cloud Condensation Nuclei Counter                              | CCN                   | Yes            | Yes  |
| Continuous Light Absorption Photometer                         | CLAP                  | Yes            | No   |
| Condensation Particle Counter                                  | CPC                   | Yes            | Yes  |
| Cimel Sunphotometer                                            | CSPHOT                | Yes            | No   |
| Doppler Lidar                                                  | DL                    | Yes            | Yes  |
| Eddy Correlation Flux Measurement System                       | ECOR                  | No             | Yes  |
| Infrared Thermometer Downlooking                               | IR Therm Grd          | Yes            | Yes  |
| Infrared Thermometer Uplooking                                 | IRT-Sky               | Yes            | Yes  |
| ARM-Standard Meteorological Instrumentation at Surface         | Met                   | Yes            | Yes  |
| Multi-Filter Radiometer                                        | MFR                   | No             | Yes  |
| Multi-Filter Rotating Shadow Band Radiometer                   | MFRSR                 | Yes            | Yes  |
| Micropulse Lidar                                               | MPL                   | No             | Yes  |
| Microwave Radiometer                                           | MWR                   | Yes            | Yes  |
| Microwave Radiometer 3 Channel                                 | MWR 3C                | Yes            | Yes  |
| Microwave Radiometer High Frequency                            | MWR HF                | No             | No   |
| Microwave Radiometer P                                         | MWR P                 | No             | No   |
| Nephelometer                                                   | Neph                  | Yes            | Yes  |
| Nephelometer, wet                                              | NephDry               | No             | Yes  |
| Normally Incident Pyroheliometer: Installed and recording data | NIP                   | Yes            | Yes  |
| Optical Rain Gauge                                             | ORG                   | No             | No   |
| Parsivel Present Weather detector                              | Parsivel2 disdrometer | No             | No   |
| Pyrogeometer, upwelling                                        | PIR-GRND              | Yes            | Yes  |
| Pyrogeometer, downwelling                                      | PIR-SKY               | Yes            | Yes  |
| Present Weather Detector                                       | PWD                   | Yes            | Yes  |
| Particle Soot Absorption Photometer                            | PSAP                  | Yes            | Yes  |
| Precision Spectral Pyranometer, upwelling                      | PSP-GRND              | Yes            | Yes  |
| Precision Spectral Pyranometer, downwelling                    | PSP-SKY               | Yes            | Yes  |
| Radar Wind Profiler                                            | RWP                   | Yes            | Yes  |
| Ka/W-band Scanning ARM Cloud Radar                             | SACR                  | No             | No   |
| Shortwave Array Spectroradiometer - 180 deg field of view      | SAS-HE                | Yes            | Yes  |
| Shortwave Array Spectroradiometer - Zenith pointing            | SAS-ZE                | Yes            | Yes  |
| Surface Energy Balance System                                  | SEBS                  | Yes            | No   |
| Sound-based wind profiler                                      | SODAR                 | Yes            | Yes  |
| Sonic Anemometer                                               | Sonic                 | No             | Yes  |
| Tipping Bucket Rain Gauge                                      | TB Rain Gauge         | No             | No   |
| Total Sky Imager                                               | TSI                   | No             | No   |
| Temperature and Humidity Sensor                                | T/RH                  | Yes            | Yes  |
| W-band (95 GHz) ARM Cloud Radar                                | WACR                  | Yes            | Yes  |
| Five daily radio sondes (0, 6, 12, 15 and 18 UTC)              |                       | Yes            | Yes  |

Table S10

| <b>Instrument</b>                | <b>Abbreviation</b> | <b>Data Available</b> |             | <b>Investigator</b> |
|----------------------------------|---------------------|-----------------------|-------------|---------------------|
|                                  |                     | <b>IOP1</b>           | <b>IOP2</b> |                     |
| Disdrometer (Joss)               |                     | Yes                   | Yes         | Machado             |
| Disdrometer (Parsivel)           |                     | Yes                   | Yes         | Machado             |
| Rain Gauge                       |                     | Yes                   | Yes         | Machado             |
| Microwave Radiometer (MP3000)    |                     | No                    | Yes         | Machado             |
| Micro Rain Radar                 | MRR                 | Yes                   | Yes         | Machado             |
| GPS-Based Integrated Water Vapor | IWV                 | Yes                   | Yes         | Machado             |
| Field Mill                       |                     | Yes                   | Yes         | Machado             |



| Instrument                                             | Abbreviation | Data Available |      |
|--------------------------------------------------------|--------------|----------------|------|
|                                                        |              | IOP1           | IOP2 |
| Global Positioning System (DSM 232)                    | GPS          | Yes            | Yes  |
| Temperature (Rosemount E102AL)                         |              | Yes            | Yes  |
| Pressure (Rosemount 1201F1)                            |              | Yes            | Yes  |
| Gust Probe: Rosemount 1221F2 (3 units)                 |              | Yes            | Yes  |
| Chilled-mirror hygrometer (GE-1011B)                   |              | Yes            | Yes  |
| Tuneable Diode Laser Hygrometer                        | TDL-H        | Yes            | Yes  |
| Aircraft Integrated Meteorological Measurement System  | AIMMS-20     | Yes            | Yes  |
| Video Camera P1347 (forward looking)                   |              | Yes            | Yes  |
| Video Camera P1344                                     |              | Yes            | Yes  |
| Ultrafine Condensation Particle Counter (Model 3025A)  | UCPC         | Yes            | Yes  |
| Condensation Particle Counter (Model 3010)             | CPC          | Yes            | Yes  |
| Fast Integrated Mobility Spectrometer                  | FIMS         | Yes            | Yes  |
| Ultra High Sensitivity Aerosol Spectrometer - Airborne | UHSAS-A      | Yes            | Yes  |
| Passive Cavity Aerosol Spectrometer                    | PCASP        | Yes            | Yes  |
| Particle/Soot Absorption Photometer                    | PSAP         | Yes            | Yes  |
| Three-Wavelength Integrating Nephelometer (Model 3563) |              | Yes            | Yes  |
| High Resolution Aerosol Mass Spectrometer              | HR-ToF-AMS   | Yes            | Yes  |
| Cloud Condensation Nuclei Counter                      | CCN Counter  | Yes            | Yes  |
| Optical Particle Counter (Model CI-3100)               | OPC          | Yes            | Yes  |
| Quadrupole Proton-Transfer-Reaction Mass Spectrometer  | PTR-MS       | Yes            | Yes  |
| N2O and CO concentrations (Los Gatos 23r)              |              | Yes            | Yes  |
| Oxides of Nitrogen (Nox)                               |              | Yes            | Yes  |
| Ozone (Thermo Scientific Model 49i)                    |              | Yes            | Yes  |
| Picarro Cavity Ring Down System (Model G1301-m)        | CRD          | Yes            | Yes  |
| Multi Element Water content System (SEA WCM-2000)      |              | Yes            | Yes  |
| High Volume Precipitation Spectrometer (Version 3)     | HVPS-3       | Yes            | Yes  |
| Two-Dimensional Stereo Probe                           | 2D-S         | Yes            | Yes  |
| Fast Cloud Droplet Probe                               | Fast-CDP     | Yes            | Yes  |
| Cloud Droplet Probe (version 2)                        | CDP ver2     | Yes            | Yes  |
| Cloud Particle Imager (version 2)                      | CPI ver2     | Yes            | Yes  |
| Sunshine Pyranometer, shaded                           | SPN-1        | Yes            | Yes  |
| Sunshine Pyranometer, unshaded (up and down looking)   | SPN-1        | Yes            | Yes  |

| Instrument                                                         | Abbreviation    | Data Available |      |
|--------------------------------------------------------------------|-----------------|----------------|------|
|                                                                    |                 | IOP1           | IOP2 |
| Counter-flow Virtual Impactor Inlet                                | CVI inlet       | No             | Yes  |
| Precipitation Imaging Probe                                        | PIP             | No             | Yes  |
| Cloud Combination Probe (Cloud ImagingProbe + Cloud Droplet Probe) | CCP (CIP + CDP) | No             | Yes  |
| Novel Ice EXpEriment - Cloud and Aerosol Particle Spectrometer     | NIXE-CAPS       | No             | Yes  |
| Small Ice Detector Probe (version 3)                               | SID-3           | No             | Yes  |
| Microwave Temperature Profiler                                     | MTP             | No             | Yes  |
| Ultra High Sensitivity Aerosol Spectrometer - Airborne             | UHSAS-A         | No             | Yes  |
| Cloud and Aerosol Spectrometer with Depolarization                 | CAS-DPOL        | No             | Yes  |
| Particle Habit Imaging and Polar Scattering Probe                  | PHIPS-HALO      | No             | Yes  |
| Compact Time of Flight Aerosol Mass Spectrometer                   | C-ToF-AMS       | No             | Yes  |
| Aerosol MEasurement SYSTem                                         | AMESTYST        | No             | Yes  |
| SiNgle-ParticleSOotPhotometer System                               | SNOOPY          | No             | Yes  |
| HALO Aerosol Submicrometer Inlet                                   | HASI            | No             | Yes  |
| Cloud Condensation Nucleus Counter                                 | CCNC            | No             | Yes  |
| Photo-Acoustic Spectrometer                                        | PAS             | No             | Yes  |
| Single Particle Soot Photometer                                    | SP-2            | No             | Yes  |
| Fast Ice Nucleus Chamber                                           | FINCH           | No             | Yes  |
| CO, O3                                                             | AMTEX           | No             | Yes  |
| SO2, HNO3, PFC                                                     | PAN-MS          | No             | Yes  |
| NOy, NO                                                            | IPA-NOy         | No             | Yes  |
| Mini Differential Optical Absorption Spectroscopy                  | miniDOAS        | No             | Yes  |
| Spectral Modular Airborne Radiation Measurement System             | SMART           | No             | Yes  |
| Imaging Spectrometer Package Eagle/Hawk                            |                 | No             | Yes  |
| Hygrometer for Atmospheric Investigations                          | HAI             | No             | Yes  |

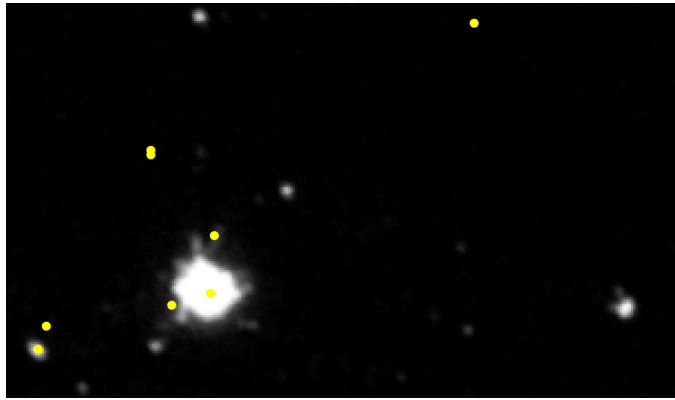

Figure S1

a. IOP1 G1 FlightTrajectories 250 m to 750 m

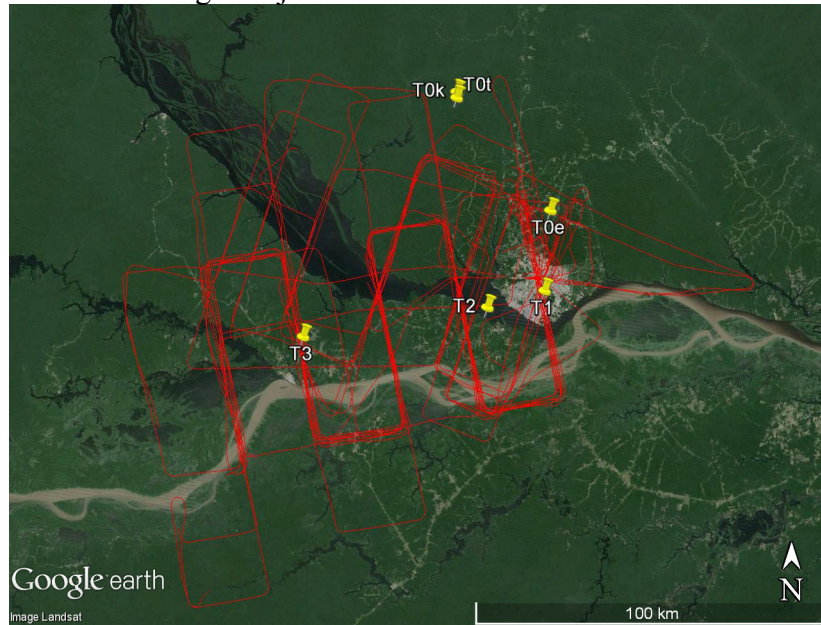

c. IOP1 G1 FlightTrajectories 1250 m to 1750 m

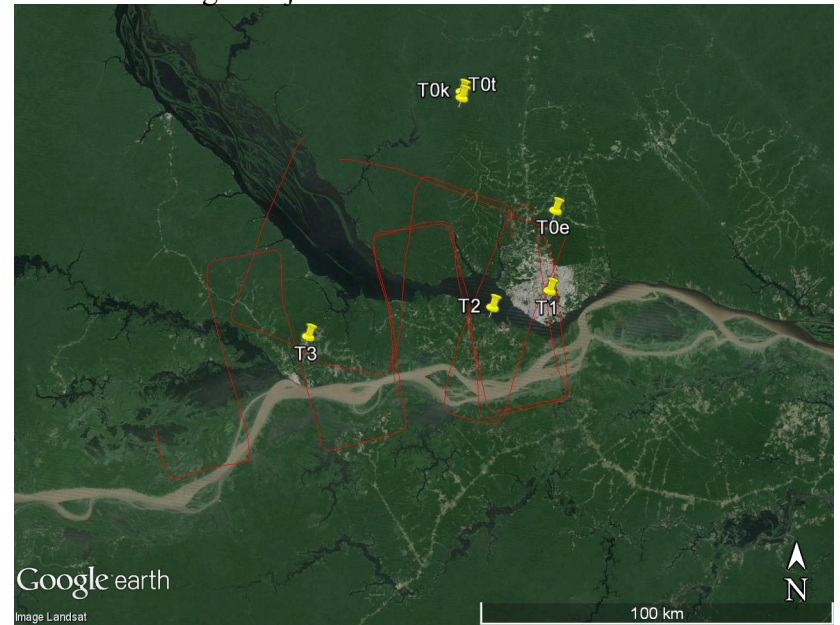

b. IOP1 G1 FlightTrajectories 750 m to 1250 m

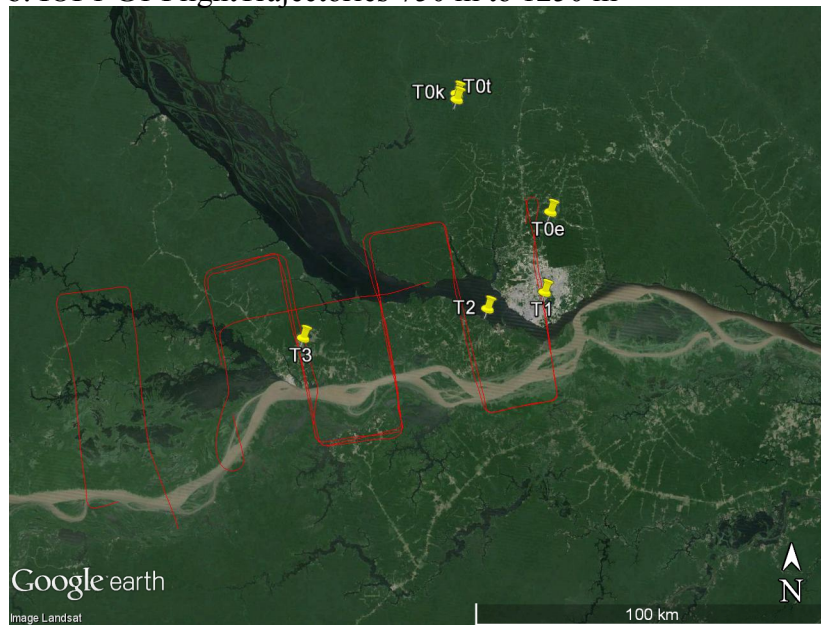

d. IOP1 G1 FlightTrajectories above 1750 m

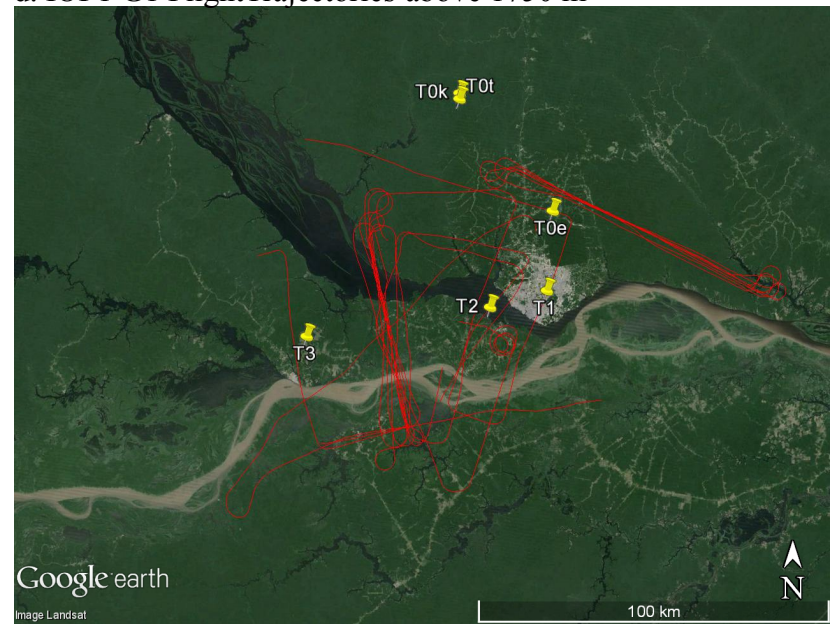

Figure S2

a. IOP2 G1 FlightTrajectories 250 m to 900 m

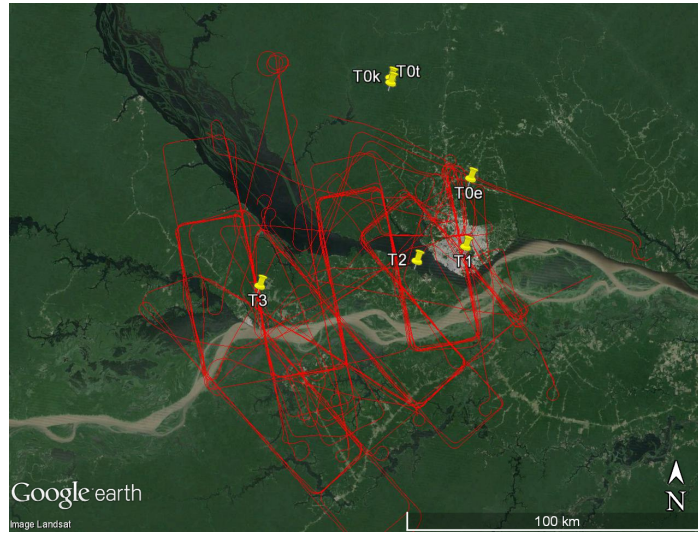

b. IOP2 G1 FlightTrajectories 1000 m to 2000 m

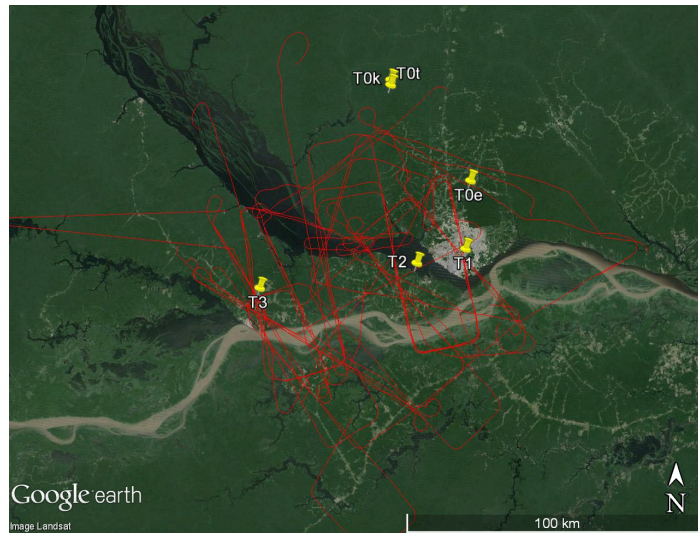

c. IOP2 G1 FlightTrajectories above 2000 m

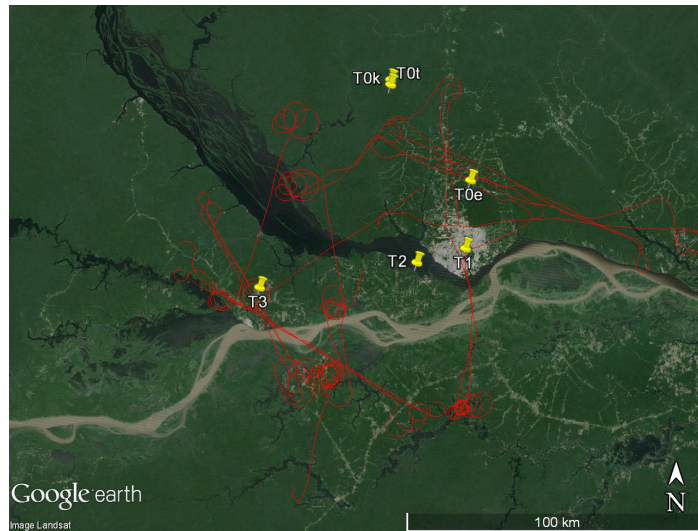

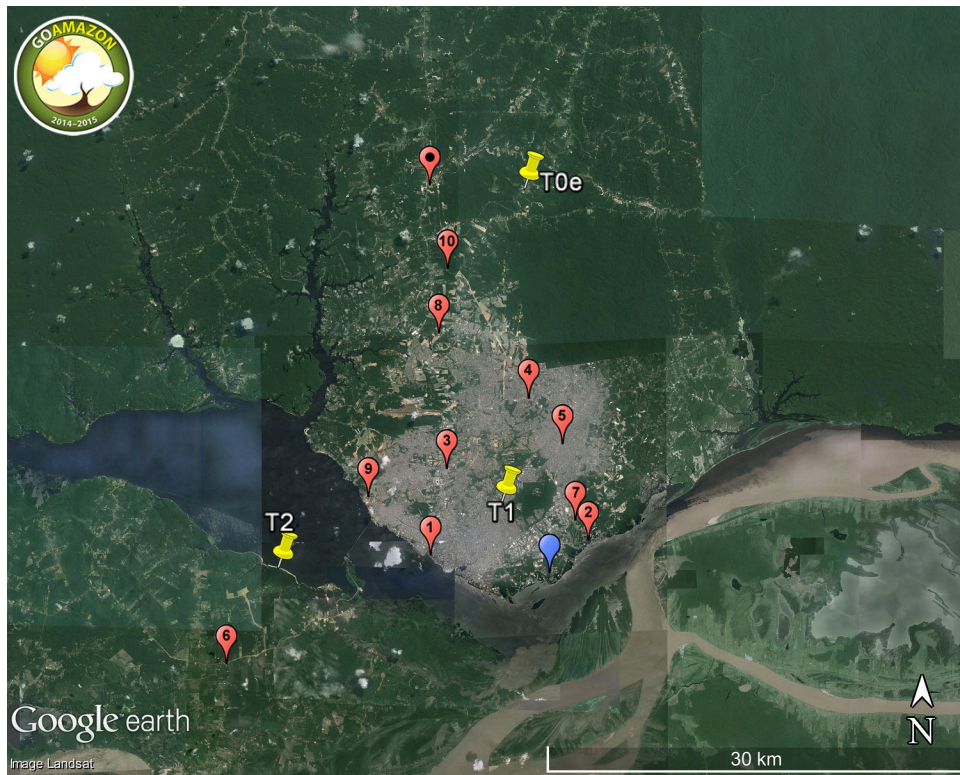

Figure S4

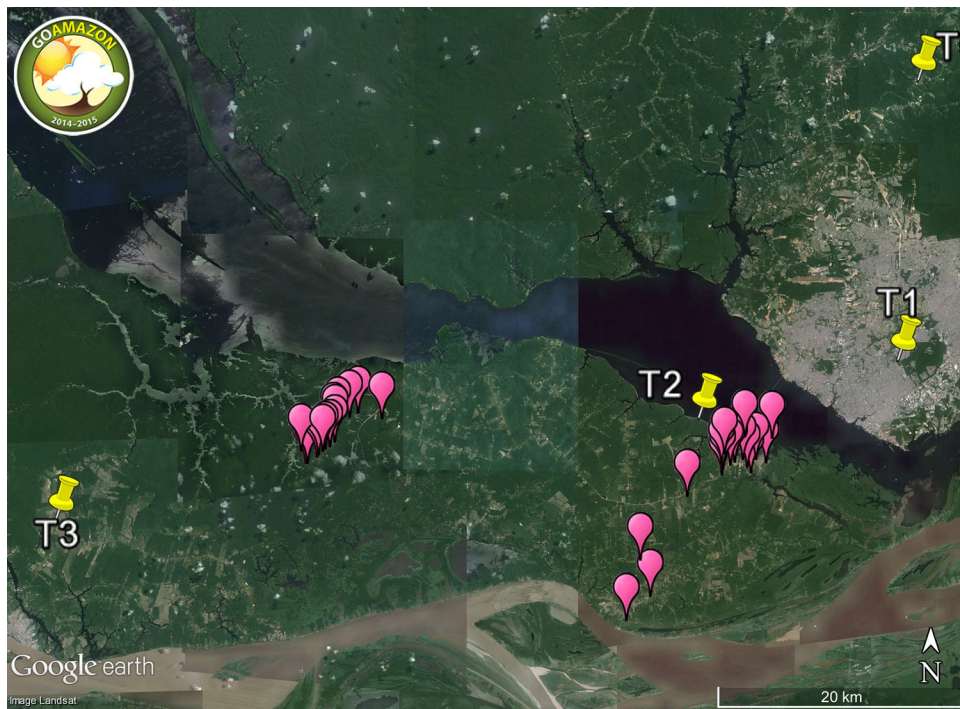

Figure S5

(a) IOP1

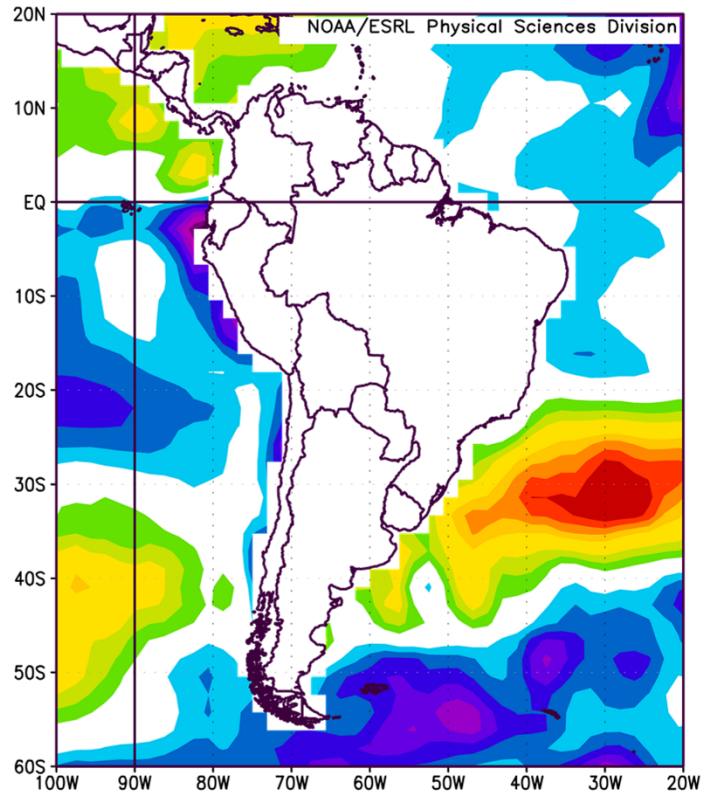

(b) IOP2

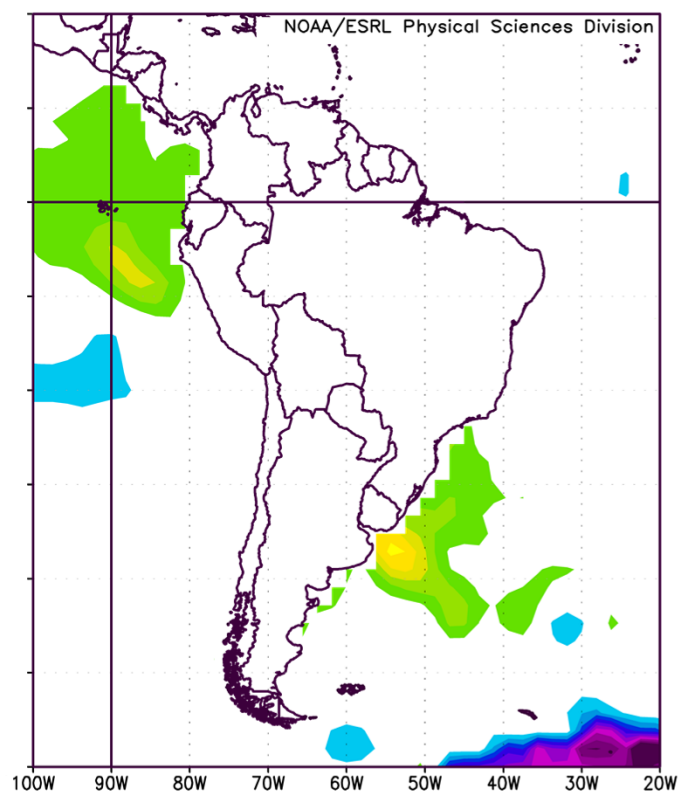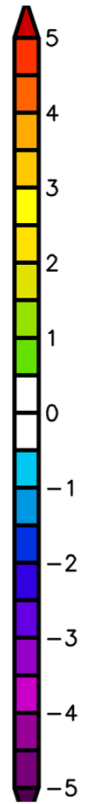



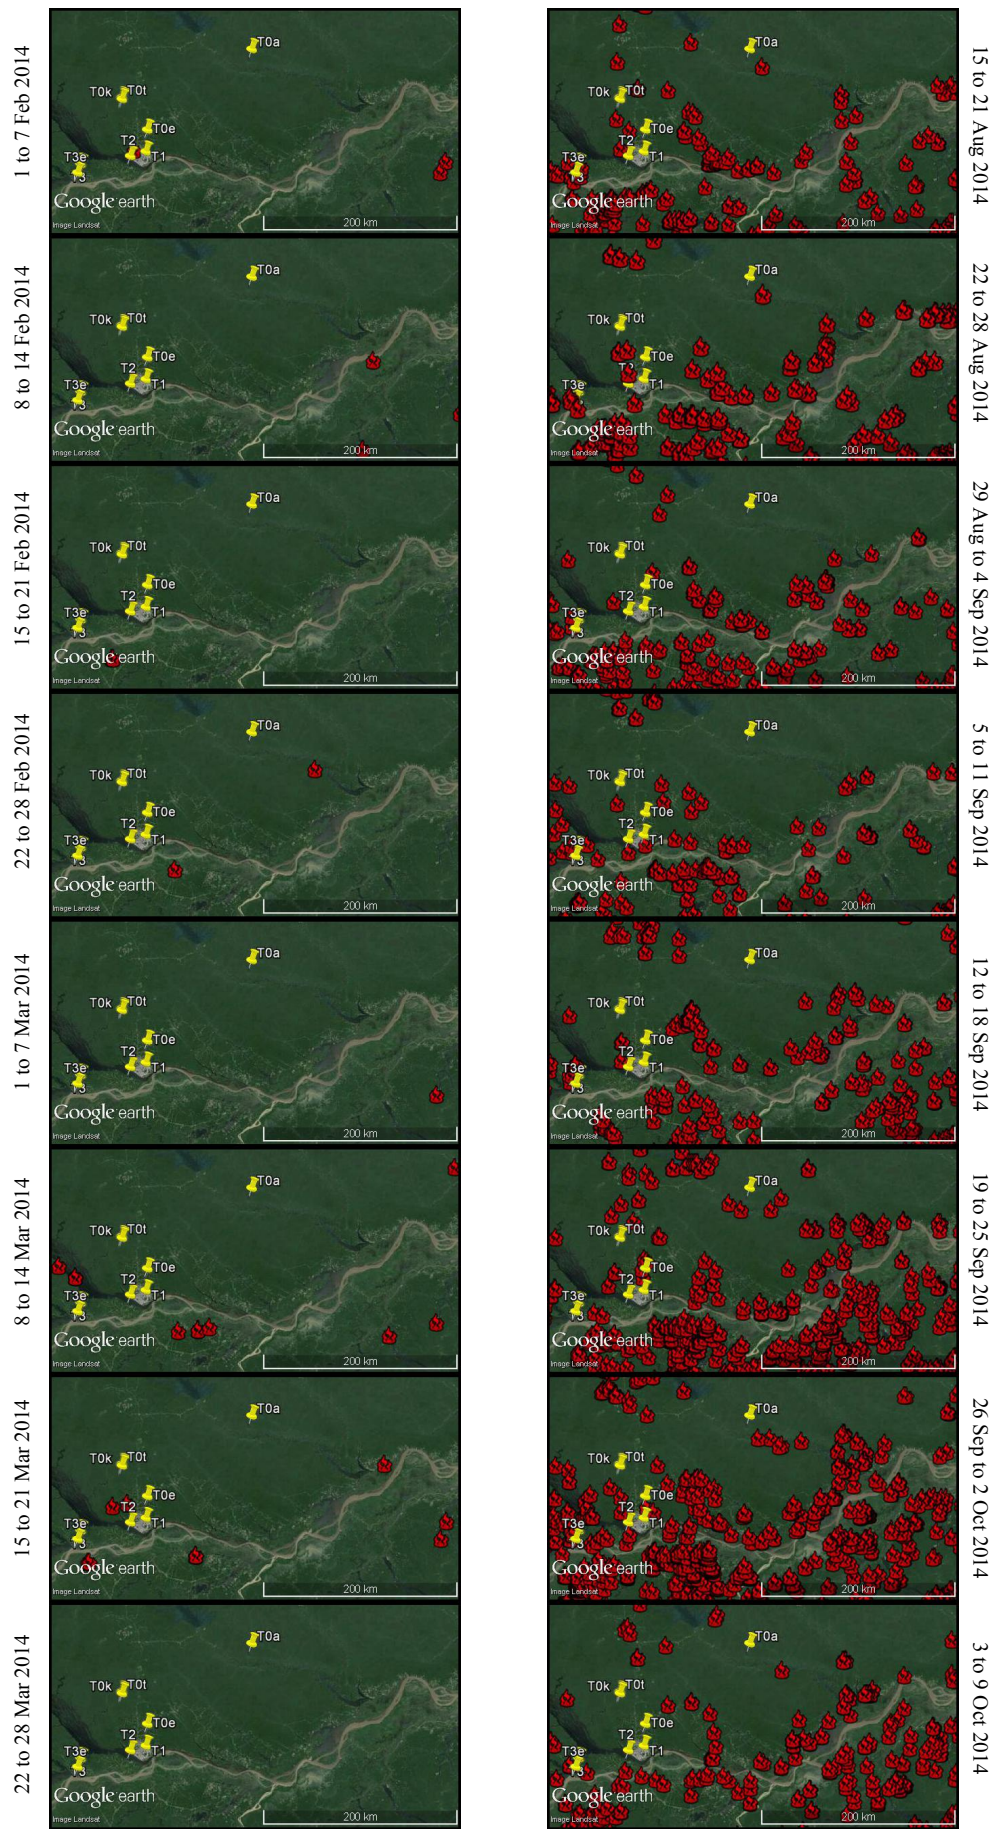

Figure S7

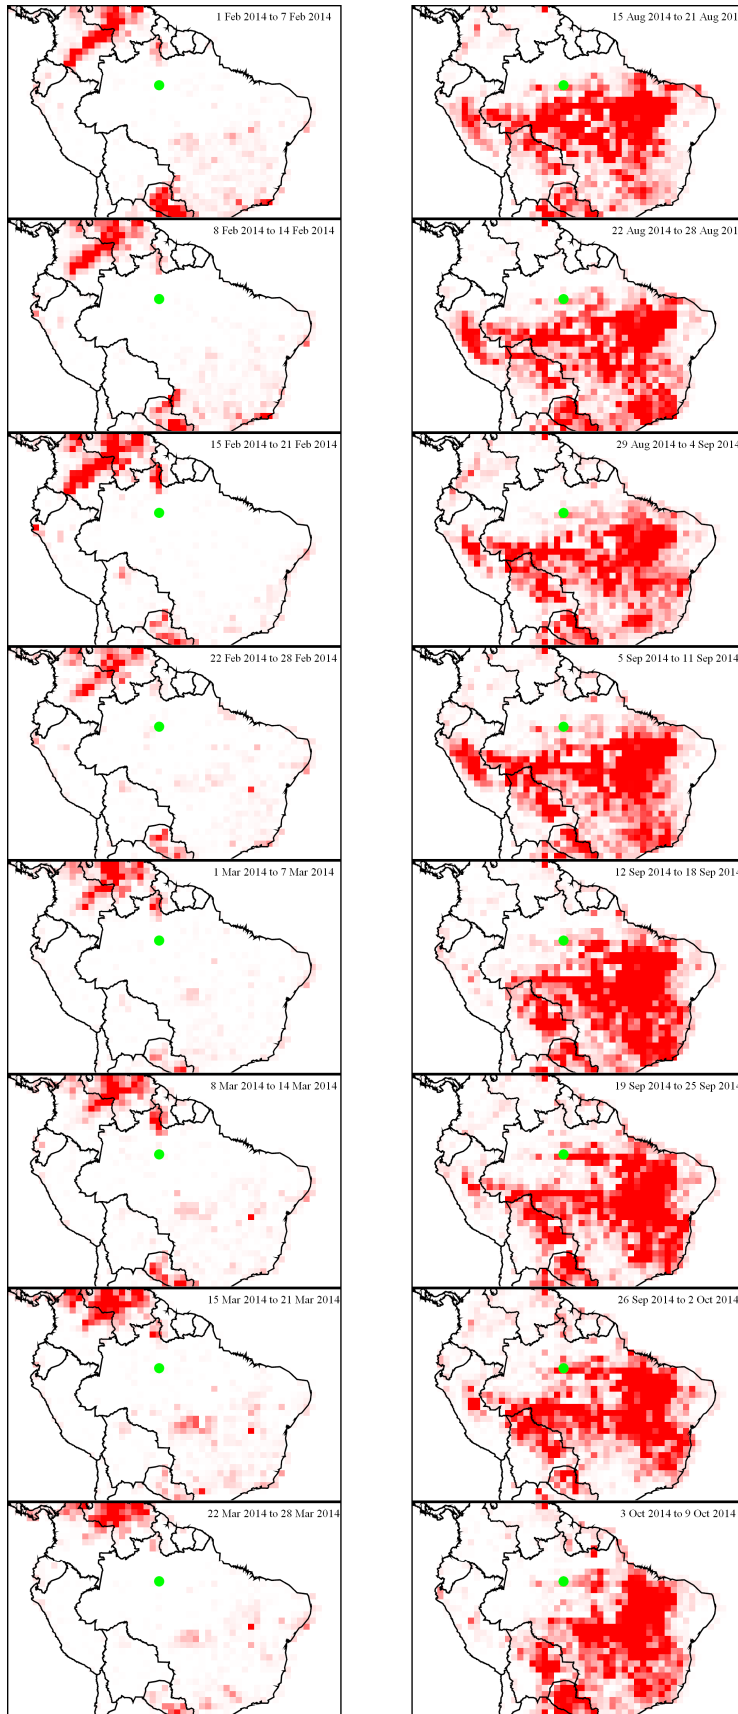

Figure S8

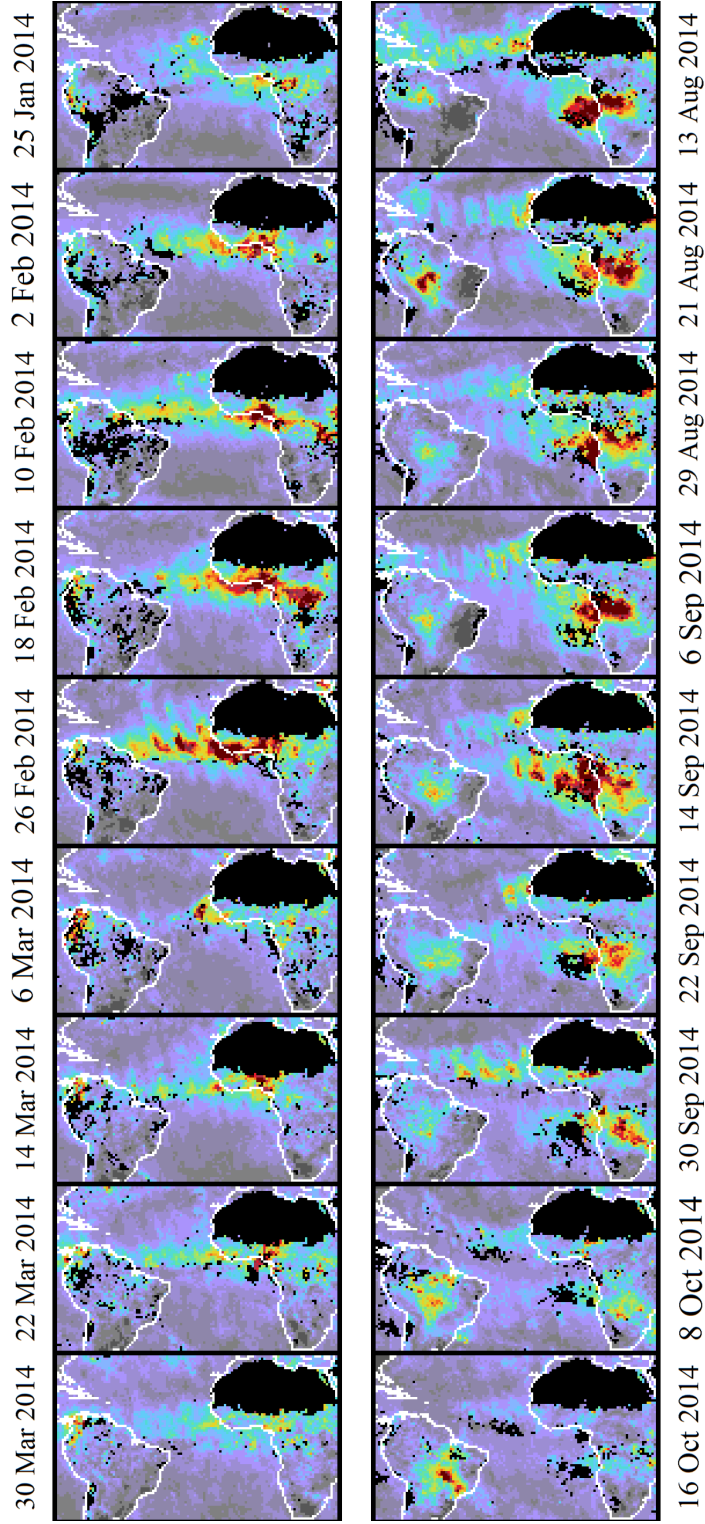

Figure S9
